# Supplementary material for: Who pays and how much? A cross-sectional study of out-of-pocket payment for modern contraception in Kenya
Source: PubMed Central journal article supplement (PMC6398787; doi:10.1136/bmjopen-2018-022414), 2019-02-20
Supplement: bmjopen-2018-022414supp002.pdf [file bmjopen-2018-022414supp002.pdf]

**Supplementary Table 2**

Out-of-pocket payment (in USD) for injectable and implant across all provider types among users with non-zero expenditure by socio-demographic characteristics.

|                               | <i>Injectable</i> |        |                    | <i>Implant</i> |        |                     |
|-------------------------------|-------------------|--------|--------------------|----------------|--------|---------------------|
|                               | n                 | Median | Mean (95% CI)      | n              | Median | Mean (95% CI)       |
| <i>Wealth quintile</i>        |                   |        |                    |                |        |                     |
| Poorest                       | 209               | \$0.80 | \$0.84 (0.77-0.91) | 29             | \$2.28 | \$3.35 (1.88-4.81)  |
| Poor                          | 417               | \$0.80 | \$0.82 (0.78-0.86) | 89             | \$2.28 | \$2.78 (2.43-3.13)  |
| Middle                        | 459               | \$0.80 | \$0.89 (0.84-0.93) | 81             | \$2.28 | \$3.03 (2.54-3.53)  |
| Wealthy                       | 519               | \$1.14 | \$0.97 (0.93-1.01) | 101            | \$2.28 | \$4.06 (2.83-5.30)  |
| Wealthiest                    | 379               | \$1.14 | \$1.14 (1.08-1.21) | 177            | \$5.70 | \$5.95 (4.74-7.17)  |
| <i>Residence</i>              |                   |        |                    |                |        |                     |
| Urban                         | 792               | \$1.14 | \$1.07 (1.03-1.11) | 230            | \$3.42 | \$5.18 (4.15-6.21)  |
| Rural                         | 1191              | \$0.80 | \$0.85 (0.82-0.88) | 246            | \$2.28 | \$3.49 (2.94-4.04)  |
| <i>Educational attainment</i> |                   |        |                    |                |        |                     |
| Less than primary             | 615               | \$0.91 | \$0.87 (0.84-0.91) | 115            | \$2.28 | \$3.88 (2.90-4.85)  |
| Less than secondary           | 915               | \$1.14 | \$0.94 (0.90-0.98) | 202            | \$2.28 | \$3.36 (2.78-3.94)  |
| Secondary+                    | 453               | \$1.14 | \$1.03 (0.98-1.08) | 160            | \$3.42 | \$5.81 (4.49-7.14)  |
| <i>Age group</i>              |                   |        |                    |                |        |                     |
| <20 years                     | 77                | \$1.14 | \$0.92 (0.85-1.00) | 9              | \$4.56 | \$3.50 (1.95-5.04)  |
| 20–29 years                   | 1032              | \$1.14 | \$0.94 (0.90-0.98) | 226            | \$2.28 | \$4.20 (3.47-4.93)  |
| 30+ years                     | 874               | \$1.14 | \$0.94 (0.90-0.97) | 242            | \$2.28 | \$4.44 (3.50-5.38)  |
| <i>Region†</i>                |                   |        |                    |                |        |                     |
| Central                       | 207               | \$1.14 | \$1.07 (1.01-1.14) | 87             | \$3.42 | \$4.51 (3.47-5.56)  |
| Coast                         | 125               | \$1.14 | \$0.99 (0.87-1.11) | 11             | \$2.28 | \$4.32 (1.35-7.29)  |
| Eastern                       | 425               | \$0.91 | \$0.91 (0.85-0.96) | 67             | \$3.42 | \$4.72 (3.79-5.64)  |
| Nairobi                       | 183               | \$1.14 | \$1.18 (1.05-1.30) | 51             | \$5.74 | \$8.03 (4.27-11.78) |
| Nyanza                        | 315               | \$0.57 | \$0.84 (0.79-0.90) | 66             | \$2.28 | \$2.90 (2.11-3.70)  |
| Rift Valley                   | 495               | \$1.14 | \$0.93 (0.89-0.98) | 129            | \$2.28 | \$4.08 (3.13-5.02)  |
| Western                       | 232               | \$0.80 | \$0.81 (0.75-0.87) | 64             | \$2.28 | \$2.58 (2.08-3.07)  |

†Due to the very low modern contraceptive prevalence (<5%), results for the North Eastern region are not presented.
