# Supplementary material for: Who pays and how much? A cross-sectional study of out-of-pocket payment for modern contraception in Kenya
Source: PubMed Central journal article supplement (PMC6398787; doi:10.1136/bmjopen-2018-022414), 2019-02-20
Supplement: bmjopen-2018-022414supp003.pdf [file bmjopen-2018-022414supp003.pdf]

### Supplementary Table 3

Among users with non-missing source of the method, percentage of modern contraceptive method by provider type.

|                                           | Govt<br>hospital | Govt health<br>center | Govt<br>dispensary | Private<br>facility | NGO/faith-<br>based<br>facility | Pharmacy/<br>chemist | Other <sup>1</sup> |
|-------------------------------------------|------------------|-----------------------|--------------------|---------------------|---------------------------------|----------------------|--------------------|
| <b>Method</b>                             |                  |                       |                    |                     |                                 |                      |                    |
| Injectable                                | 36.2%            | 49.4%                 | 62.0%              | 65.6%               | 29.4%                           | 24.6%                | 5.8%               |
| Implant                                   | 27.4%            | 29.4%                 | 20.9%              | 14.7%               | 17.8%                           | –†                   | 10.7%              |
| Condom                                    | 4.1%             | 3.1%                  | 3.1%               | 1.6%                | 0.4%                            | 13.2%                | 73.7%              |
| Pill                                      | 7.3%             | 8.0%                  | 9.2%               | 8.1%                | 4.6%                            | 61.6%                | 7.8%               |
| IUD                                       | 9.4%             | 5.6%                  | 2.6%               | 7.3%                | 18.2%                           | –†                   | 0.7%               |
| Other modern methods <sup>2</sup>         | 15.7%            | 4.5%                  | 2.2%               | 2.8%                | 29.7%                           | 0.5%                 | 1.3%               |
| TOTAL                                     | 100%             | 100%                  | 100%               | 100%                | 100%                            | 100%                 | 100%               |
| <i>Total number of users (weighted n)</i> | <i>1,106</i>     | <i>863</i>            | <i>1,304</i>       | <i>1,313</i>        | <i>129</i>                      | <i>622</i>           | <i>379</i>         |

<sup>1</sup> Includes DHS response options: mobile clinic and other private medical

<sup>2</sup> Includes other modern FP methods such as female and male sterilisation and female condoms.

† No respondents reported this provider and method.
