# Supplementary material for: Who pays and how much? A cross-sectional study of out-of-pocket payment for modern contraception in Kenya
Source: PubMed Central journal article supplement (PMC6398787; doi:10.1136/bmjopen-2018-022414), 2019-02-20
Supplement: bmjopen-2018-022414supp004.pdf [file bmjopen-2018-022414supp004.pdf]

**Supplementary Table 4**

Proportion reporting free family planning by provider among users initiating their long-acting contraceptive method before or after June 2013 abolition of fees.

|                                        | Govt<br>hospital<br>% (95% CI) | Govt health<br>centre<br>% (95% CI) | Govt<br>dispensary<br>% (95% CI) | TOTAL<br>PUBLIC<br>% (95% CI) |
|----------------------------------------|--------------------------------|-------------------------------------|----------------------------------|-------------------------------|
| <i>Initiated before June 2013</i>      |                                |                                     |                                  |                               |
| IUD (n=898)                            | 49.9<br>(36.6–63.2)            | 78.8<br>(59.5–90.4)                 | 76.9<br>(56.4–89.6)              | 61.2<br>(51.5–70.1)           |
| Implant (n=469)                        | 51.3<br>(40.6–61.9)            | 62.7<br>(51.5–72.7)                 | 57.8<br>(48.3–66.7)              | 56.6<br>(50.4–62.7)           |
| <i>Initiated from June 2013 onward</i> |                                |                                     |                                  |                               |
| IUD (n=48)                             | 48.5<br>(26.4–71.2)            | 69.2<br>(41.6–87.6)                 | 64.6<br>(32.1–87.6)              | 59.2<br>(42.8–73.7)           |
| Implant (n=357)                        | 61.2<br>(50.5–70.9)            | 63.2<br>(50.0–74.7)                 | 65.6<br>(56.0–74.0)              | 63.4<br>(56.9–69.5)           |
