# Supplementary material for: Who pays and how much? A cross-sectional study of out-of-pocket payment for modern contraception in Kenya
Source: BMJ Open. 2019 Feb 20;9(2):e022414. doi: 10.1136/bmjopen-2018-022414 (PMC6398787; doi:10.1136/bmjopen-2018-022414)
Supplement: Supplementary data [file bmjopen-2018-022414supp001.pdf]

**Supplementary Table 1**

Summary of out-of-pocket payment (in USD) for injectable and implant users among users with non-zero expenditure, by most recent provider of the contraceptive method, with different methods for dealing with outliers.

*a. Observations greater than two standard deviations from the mean recoded as equal to the mean.*

|                          | Govt<br>hospital | Govt<br>health<br>centre | Govt<br>dispensary | TOTAL<br>PUBLIC | Private<br>facility | NGO/faith-<br>based<br>facility | Pharmacy/<br>chemist | Other <sup>1</sup> | TOTAL  |
|--------------------------|------------------|--------------------------|--------------------|-----------------|---------------------|---------------------------------|----------------------|--------------------|--------|
| <b><i>Injectable</i></b> |                  |                          |                    |                 |                     |                                 |                      |                    |        |
| n                        | 247              | 225                      | 490                | 962             | 821                 | 28                              | 148                  | 17                 | 1,976  |
| Mean cost in USD         | \$0.83           | \$0.78                   | \$0.74             | \$0.75          | \$1.07              | \$1.01                          | \$1.08               | \$1.06             | \$0.91 |
| SD                       | 0.412            | 0.399                    | 0.385              | 0.343           | 0.277               | 0.560                           | 0.278                | 0.280              | 0.349  |
| 25th percentile          | \$0.57           | \$0.57                   | \$0.57             | \$0.57          | \$0.91              | \$0.57                          | \$0.91               | \$1.14             | \$0.57 |
| 50th percentile (median) | \$0.57           | \$0.57                   | \$0.57             | \$0.57          | \$1.14              | \$0.80                          | \$1.14               | \$1.14             | \$1.14 |
| 75th percentile          | \$1.14           | \$1.14                   | \$1.14             | \$1.14          | \$1.14              | \$1.14                          | \$1.14               | \$1.14             | \$1.14 |
| <b><i>Implant</i></b>    |                  |                          |                    |                 |                     |                                 |                      |                    |        |
| n                        | 136              | 94                       | 102                | 332             | 130                 | 11                              | -                    | 3                  | 477    |
| Mean cost in USD         | \$3.48           | \$2.90                   | \$2.37             | \$2.97          | \$7.47              | \$6.43                          | -                    | \$6.20             | \$4.31 |
| SD                       | 3.363            | 2.525                    | 1.629              | 2.724           | 5.034               | 4.430                           | -                    | 6.090              | 4.096  |
| 25th percentile          | \$2.28           | \$1.14                   | \$1.14             | \$1.14          | \$3.42              | \$2.28                          | -                    | \$1.14             | \$2.28 |
| 50th percentile (median) | \$2.28           | \$2.28                   | \$2.28             | \$2.28          | \$5.74              | \$9.12                          | -                    | \$1.14             | \$2.28 |
| 75th percentile          | \$3.42           | \$3.42                   | \$2.28             | \$3.42          | \$11.40             | \$9.12                          | -                    | \$1.14             | \$5.70 |

*b. Observations greater than two standard deviations from the mean recoded to missing.*

|                          | Govt<br>hospital | Govt<br>health<br>centre | Govt<br>dispensary | TOTAL<br>PUBLIC | Private<br>facility | NGO/faith-<br>based<br>facility | Pharmacy/<br>chemist | Other <sup>1</sup> | TOTAL  |
|--------------------------|------------------|--------------------------|--------------------|-----------------|---------------------|---------------------------------|----------------------|--------------------|--------|
| <b><i>Injectable</i></b> |                  |                          |                    |                 |                     |                                 |                      |                    |        |
| n                        | 237              | 216                      | 476                | 929             | 794                 | 21                              | 144                  | 17                 | 1,905  |
| Mean cost in USD         | \$0.81           | \$0.74                   | \$0.71             | \$0.74          | \$1.07              | \$0.82                          | \$1.09               | \$1.06             | \$0.91 |
| SD                       | 0.387            | 0.327                    | 0.330              | 0.346           | 0.282               | 0.338                           | 0.282                | 0.280              | 0.355  |
| 25th percentile          | \$0.57           | \$0.57                   | \$0.57             | \$0.57          | \$0.91              | \$0.57                          | \$0.91               | \$1.14             | \$0.57 |
| 50th percentile (median) | \$0.57           | \$0.57                   | \$0.57             | \$0.57          | \$1.14              | \$0.80                          | \$1.14               | \$1.14             | \$1.14 |
| 75th percentile          | \$1.14           | \$1.14                   | \$1.14             | \$1.14          | \$1.14              | \$1.14                          | \$1.14               | \$1.14             | \$1.14 |
| <b><i>Implant</i></b>    |                  |                          |                    |                 |                     |                                 |                      |                    |        |
| n                        | 135              | 94                       | 102                | 331             | 109                 | 11                              | -                    | 3                  | 454    |
| Mean cost in USD         | \$3.47           | \$2.90                   | \$2.37             | \$2.97          | \$7.81              | \$6.43                          | -                    | \$6.20             | \$4.24 |
| SD                       | 3.367            | 2.525                    | 1.629              | 2.724           | 5.454               | 4.430                           | -                    | 6.090              | 4.183  |
| 25th percentile          | \$2.28           | \$1.14                   | \$1.14             | \$1.14          | \$2.85              | \$2.28                          | -                    | \$1.14             | \$2.28 |
| 50th percentile (median) | \$2.28           | \$2.28                   | \$2.28             | \$2.28          | \$5.70              | \$9.12                          | -                    | \$1.14             | \$2.28 |
| 75th percentile          | \$3.42           | \$3.42                   | \$2.28             | \$3.42          | \$11.40             | \$9.12                          | -                    | \$11.40            | \$5.70 |

*c. Observations greater than two standard deviations from the mean recoded as equal to the value two standard deviations from the mean.*

|                          | Govt<br>hospital | Govt<br>health<br>centre | Govt<br>dispensary | TOTAL<br>PUBLIC | Private<br>facility | NGO/faith-<br>based<br>facility | Pharmacy/<br>chemist | Other <sup>1</sup> | TOTAL  |
|--------------------------|------------------|--------------------------|--------------------|-----------------|---------------------|---------------------------------|----------------------|--------------------|--------|
| <b><i>Injectable</i></b> |                  |                          |                    |                 |                     |                                 |                      |                    |        |
| n                        | 247              | 225                      | 490                | 962             | 821                 | 28                              | 148                  | 17                 | 1,976  |
| Mean cost in USD         | \$0.86           | \$0.80                   | \$0.75             | \$0.79          | \$1.11              | \$1.13                          | \$1.11               | \$1.06             | \$0.95 |
| SD                       | 0.454            | 0.419                    | 0.396              | 0.419           | 0.331               | 0.628                           | 0.319                | 0.280              | 0.412  |
| 25th percentile          | \$0.57           | \$0.57                   | \$0.57             | \$0.57          | \$0.91              | \$0.57                          | \$0.91               | \$1.14             | \$0.57 |
| 50th percentile (median) | \$0.57           | \$0.57                   | \$0.57             | \$0.57          | \$1.14              | \$0.80                          | \$1.14               | \$1.14             | \$1.14 |
| 75th percentile          | \$1.14           | \$1.14                   | \$1.14             | \$1.14          | \$1.14              | \$1.71                          | \$1.14               | \$1.14             | \$1.14 |
| <b><i>Implant</i></b>    |                  |                          |                    |                 |                     |                                 |                      |                    |        |
| n                        | 136              | 94                       | 102                | 332             | 130                 | 11                              | -                    | 3                  | 477    |
| Mean cost in USD         | \$3.54           | \$2.90                   | \$2.37             | \$3.00          | \$10.16             | \$6.43                          | -                    | \$6.20             | \$5.06 |
| SD                       | 3.559            | 2.525                    | 1.629              | 2.829           | 7.236               | 4.430                           | -                    | 6.090              | 5.528  |
| 25th percentile          | \$2.28           | \$1.14                   | \$1.14             | \$1.14          | \$3.42              | \$2.28                          | -                    | \$1.14             | \$2.28 |
| 50th percentile (median) | \$2.28           | \$2.28                   | \$2.28             | \$2.28          | \$6.84              | \$9.12                          | -                    | \$1.14             | \$2.28 |
| 75th percentile          | \$3.42           | \$3.42                   | \$2.28             | \$3.42          | \$17.10             | \$9.12                          | -                    | \$11.40            | \$5.70 |

d. Observations greater than 1.5 times the interquartile range recoded to missing.

|                          | Govt<br>hospital | Govt<br>health<br>centre | Govt<br>dispensary | TOTAL<br>PUBLIC | Private<br>facility | NGO/faith-<br>based<br>facility | Pharmacy/<br>chemist | Other <sup>1</sup> | TOTAL  |
|--------------------------|------------------|--------------------------|--------------------|-----------------|---------------------|---------------------------------|----------------------|--------------------|--------|
| <b><i>Injectable</i></b> |                  |                          |                    |                 |                     |                                 |                      |                    |        |
| n                        | 237              | 216                      | 476                | 929             | 794                 | 21                              | 144                  | 17                 | 1,905  |
| Mean cost in USD         | \$0.81           | \$0.74                   | \$0.71             | \$0.74          | \$1.07              | \$0.82                          | \$1.09               | \$1.06             | \$0.91 |
| SD                       | 0.387            | 0.327                    | 0.330              | 0.346           | 0.282               | 0.338                           | 0.282                | 0.280              | 0.355  |
| 25th percentile          | \$0.57           | 0.57                     | 0.57               | \$0.57          | 0.912               | 0.57                            | 0.912                | 1.14               | \$0.57 |
| 50th percentile (median) | \$0.57           | 0.57                     | 0.57               | \$0.57          | 1.14                | 0.798                           | 1.14                 | 1.14               | \$1.14 |
| 75th percentile          | \$1.14           | 1.14                     | 1.14               | \$1.14          | 1.14                | 1.14                            | 1.14                 | 1.14               | \$1.14 |
| <b><i>Implant</i></b>    |                  |                          |                    |                 |                     |                                 |                      |                    |        |
| n                        | 128              | 89                       | 102                | 319             | 72                  | 9                               | -                    | 2                  | 401    |
| Mean cost in USD         | \$2.80           | \$2.43                   | \$2.37             | \$2.56          | \$4.33              | \$5.12                          | -                    | \$1.14             | \$2.93 |
| SD                       | 1.738            | 1.565                    | 1.629              | 1.663           | 2.060               | 3.647                           | -                    | 0.000              | 1.948  |
| 25th percentile          | \$2.28           | \$1.14                   | \$1.14             | \$1.14          | \$2.28              | \$2.28                          | -                    | \$1.14             | \$1.71 |
| 50th percentile (median) | \$2.28           | \$2.28                   | \$2.28             | \$2.28          | \$3.42              | \$2.28                          | -                    | \$1.14             | \$2.28 |
| 75th percentile          | \$3.42           | \$2.85                   | \$2.28             | \$3.42          | \$5.70              | \$9.12                          | -                    | \$1.14             | \$3.42 |

e. Observations greater than 1.5 times the interquartile range recoded as equal to the value 1.5 times the interquartile range.

|                          | Govt<br>hospital | Govt<br>health<br>centre | Govt<br>dispensary | TOTAL<br>PUBLIC | Private<br>facility | NGO/faith-<br>based<br>facility | Pharmacy/<br>chemist | Other <sup>1</sup> | TOTAL  |
|--------------------------|------------------|--------------------------|--------------------|-----------------|---------------------|---------------------------------|----------------------|--------------------|--------|
| <b><i>Injectable</i></b> |                  |                          |                    |                 |                     |                                 |                      |                    |        |
| n                        | 247              | 225                      | 490                | 962             | 821                 | 28                              | 148                  | 17                 | 1,976  |
| Mean cost in USD         | \$0.86           | \$0.80                   | \$0.75             | \$0.79          | \$1.10              | \$1.11                          | \$1.11               | \$1.06             | \$0.95 |
| SD                       | 0.445            | 0.408                    | 0.388              | 0.410           | 0.323               | 0.595                           | 0.313                | 0.280              | 0.403  |
| 25th percentile          | \$0.57           | \$0.57                   | \$0.57             | \$0.57          | \$0.91              | \$0.57                          | \$0.91               | \$1.14             | \$0.57 |
| 50th percentile (median) | \$0.57           | \$0.57                   | \$0.57             | \$0.57          | \$1.14              | \$0.80                          | \$1.14               | \$1.14             | \$1.14 |
| 75th percentile          | \$1.14           | \$1.14                   | \$1.14             | \$1.14          | \$1.14              | \$1.71                          | \$1.14               | \$1.14             | \$1.14 |
| <b><i>Implant</i></b>    |                  |                          |                    |                 |                     |                                 |                      |                    |        |
| n                        | 136              | 94                       | 102                | 332             | 130                 | 11                              | -                    | 3                  | 477    |
| Mean cost in USD         | \$3.25           | \$2.87                   | \$2.37             | \$2.87          | \$7.27              | \$6.14                          | -                    | \$5.92             | \$4.18 |
| SD                       | 2.515            | 2.424                    | 1.629              | 2.274           | 3.583               | 3.994                           | -                    | 5.751              | 3.394  |
| 25th percentile          | \$2.28           | \$1.14                   | \$1.14             | \$1.14          | \$3.42              | \$2.28                          | -                    | \$1.14             | \$2.28 |
| 50th percentile (median) | \$2.28           | \$2.28                   | \$2.28             | \$2.28          | \$6.84              | \$9.12                          | -                    | \$1.14             | \$2.28 |
| 75th percentile          | \$3.42           | \$3.42                   | \$2.28             | \$3.42          | \$10.83             | \$9.12                          | -                    | \$10.83            | \$5.70 |

<sup>1</sup> Includes DHS response options: mobile clinic and other private medical  
SD: Standard deviation
